# Supplementary material for: Efficacy and safety of interferon-gamma in chronic granulomatous disease: a systematic review and meta-analysis
Source: Research Square preprint supplement (doi:10.21203/rs.3.rs-2035118/v1), 2022-09-13
Supplement: Supplementary file 1 [file 52cb74d9357223436120ebfe.docx]

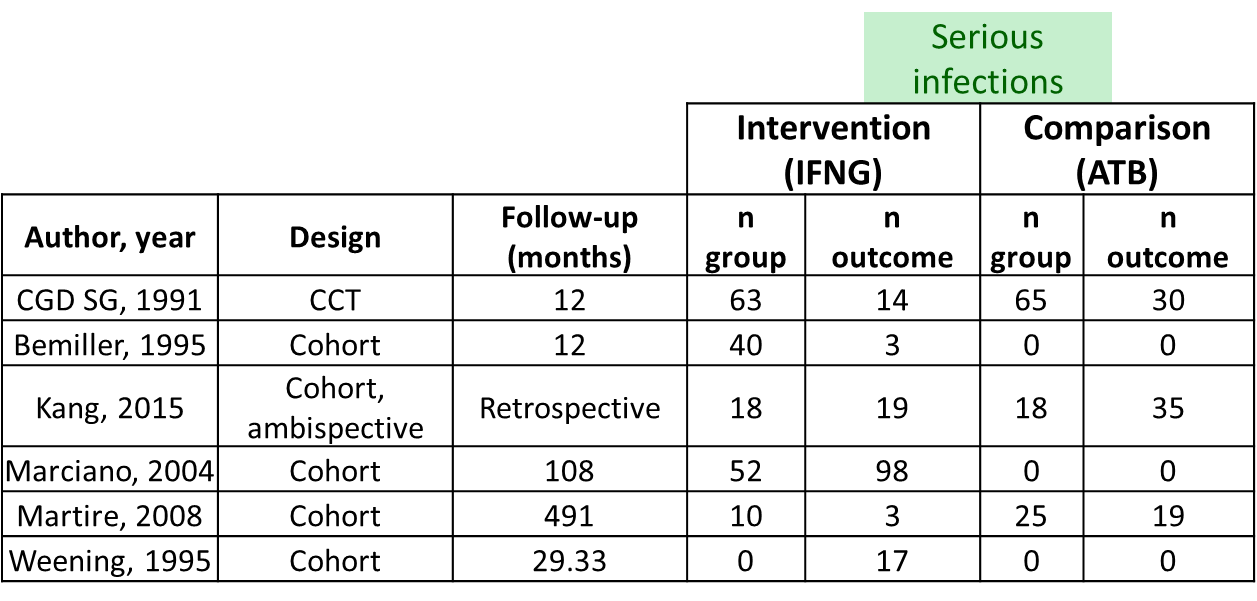


**Table 1.** Included studies outcomes for serious infections in the intervention and comparison groups.


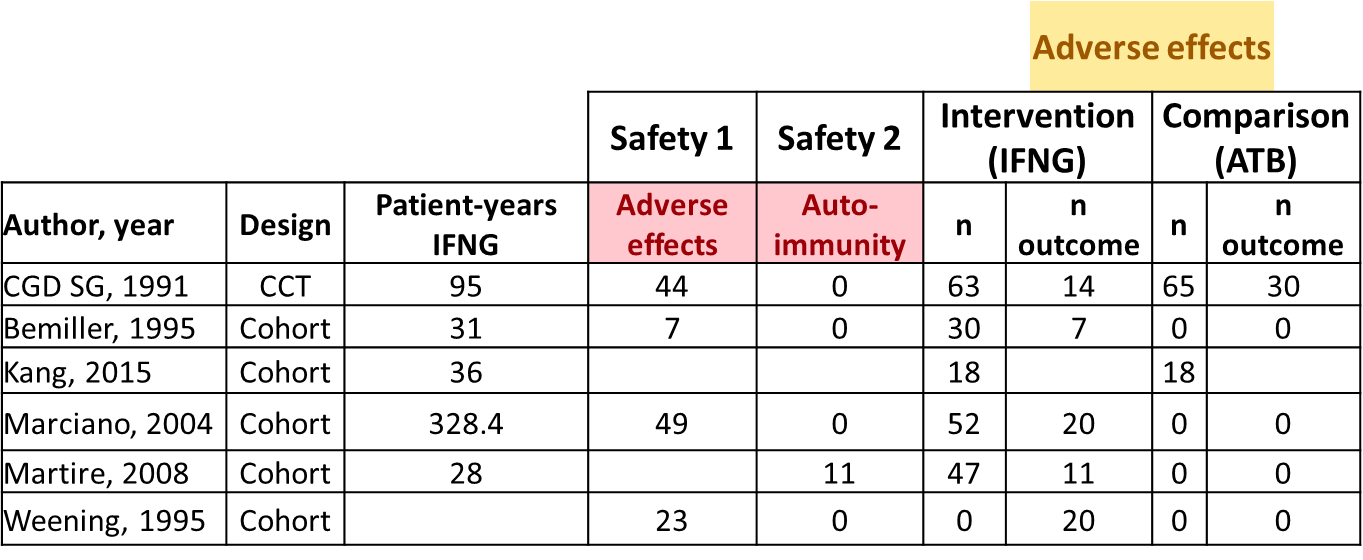


**Table 2.** Outcomes for Adverse effects and Auto-immune complications in the included studies, for intervention and control groups.
